# Supplementary material for: Associations between cardiorespiratory fitness and weight loss in patients with severe obesity undergoing an intensive lifestyle intervention program: retrospective cohort study
Source: PubMed Central journal article supplement (PMC6604389; doi:10.1186/s12902-019-0394-z), 2019-07-01
Supplement: 12902_2019_394_MOESM2_ESM.pdf [file 12902_2019_394_MOESM2_ESM.pdf]

## **Associations between cardiorespiratory fitness and weight loss in patients with severe obesity: retrospective cohort study**

Jarle Berge<sup>1,2,3</sup>, Øyvind Støren<sup>3</sup>, Jens K. Hertel<sup>1</sup>, Espen Gjevestad<sup>1,2,4</sup>, Milada Cvancarova Småstuen<sup>1</sup>, Jøran Hjølmesæth<sup>1,5</sup>.

1. Morbid Obesity Centre, Vestfold Hospital Trust, Tønsberg, Norway. 2. Clinic Medicine and Rehabilitation, Vestfold Hospital Trust, Tønsberg, Norway 3. Nature, health and environment, University of Southeast, Bø in Telemark, Norway. 4. Norwegian Police University College, Stavern, Norway. 5. Department of Endocrinology, Morbid Obesity and Preventive Medicine, Institute of Clinical Medicine, University of Oslo, Oslo, Norway

**Correspondence:** Jarle Berge, Vestfold Hospital Trust, Box 2168, 3103 Tønsberg, Norway.  
Email: [Jarle.berge@siv.no](mailto:Jarle.berge@siv.no)

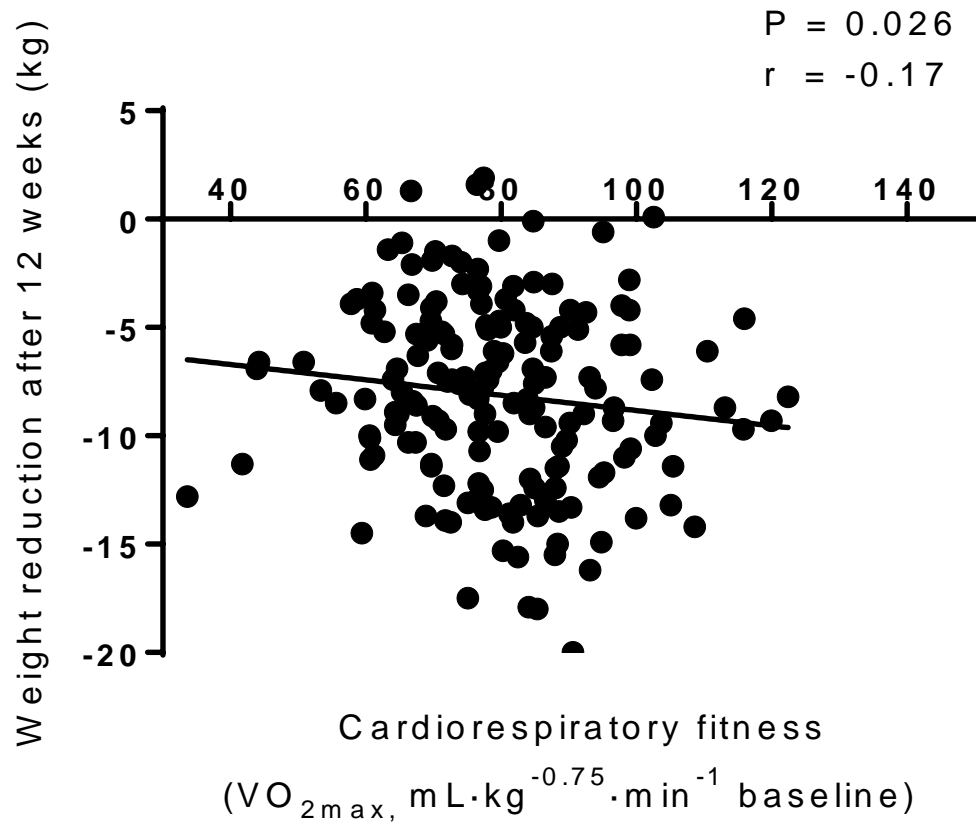

Figure S1

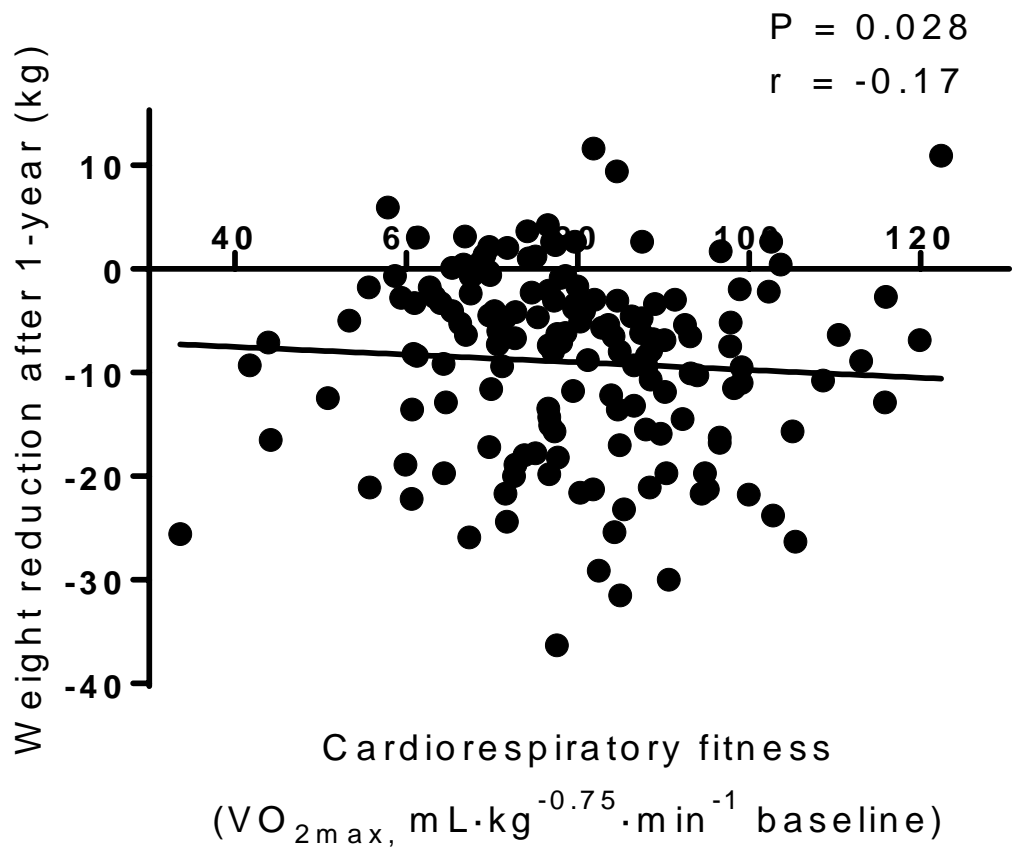

Figure S2

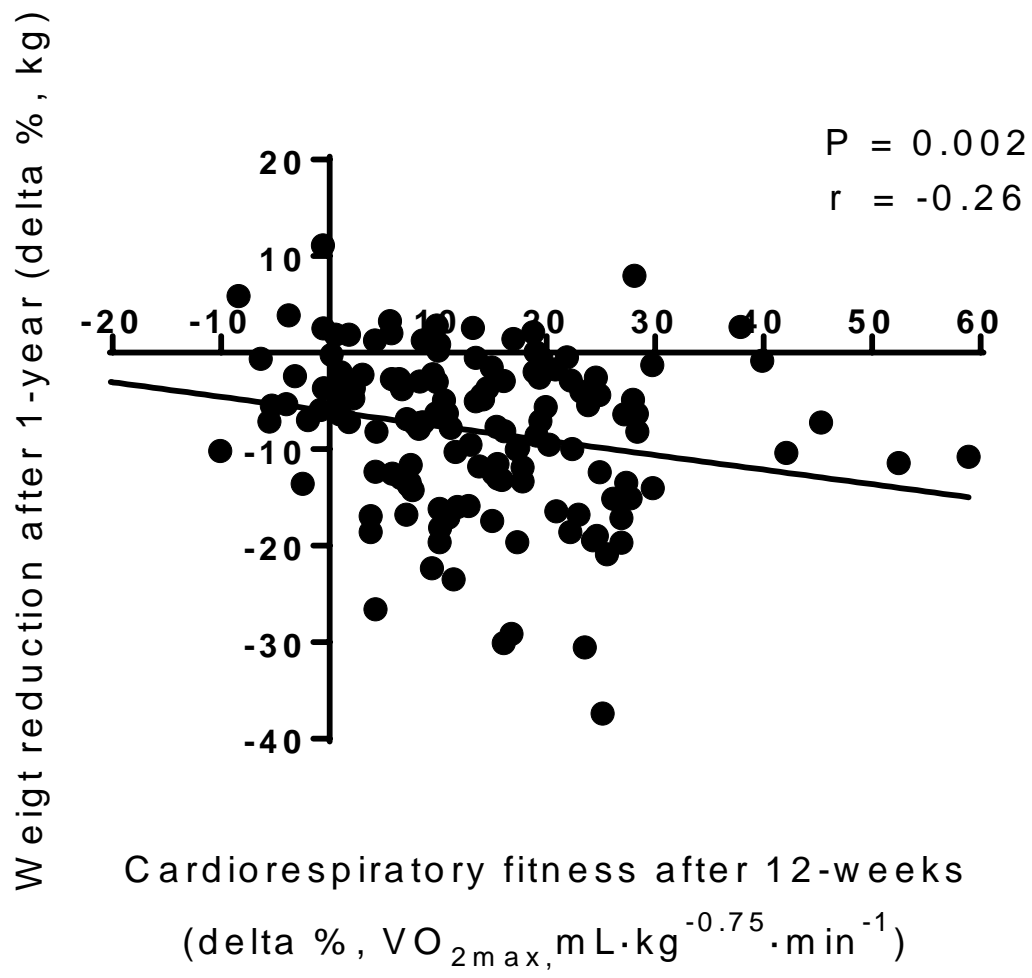

Figure S3
